# Supplementary material for: Additional value of screening for minor genes and copy number variants in hypertrophic cardiomyopathy
Source: PLoS One. 2017 Aug 3;12(8):e0181465. doi: 10.1371/journal.pone.0181465 (PMC5542623; doi:10.1371/journal.pone.0181465)
Supplement: S1 Table — (XLSX) [file pone.0181465.s001.xlsx]

## Sheet: Supplementary Table 1
S1 Table. Isoforms analysed of the 25 known or candidate HCM genes included in the custom NGS panels.
Gene	Isoform
ACTC1	NM_005159
ACTN2	NM_001103
CAV3	NM_033337
CSRP3	NM_003476
GLA	NM_000169
JPH2	NM_020433
LAMP2	NM_002294
LDB3	NM_001080116
MYBPC3	NM_000256
MYH6	NM_002471
MYH7	NM_000257
MYL2	NM_000432
MYL3	NM_000258
MYOZ2	NM_016599
PDLIM3	NM_014476
PLN	NM_002667
PRKAG2	NM_016203
RYR2	NM_001035
TCAP	NM_003673
TNNC1	NM_003280
TNNI3	NM_000363
TNNT2	NM_001001430
TPM1	NM_000366
TTN	NM_133378
VCL	NM_014000
