# Supplementary material for: Additional value of screening for minor genes and copy number variants in hypertrophic cardiomyopathy
Source: PLoS One. 2017 Aug 3;12(8):e0181465. doi: 10.1371/journal.pone.0181465 (PMC5542623; doi:10.1371/journal.pone.0181465)
Supplement: S3 Table — (XLSX) [file pone.0181465.s003.xlsx]

## Sheet: Hoja2
S3 Table. Rare variants (MAF <0.0001) in the 5 most frequent sarcomere genes, 25 genes associated with or candidates for HCM and 24 genes (same panel excluding TTN).
	Main Sarcomere Genes				25 Gene Panel		24 Genes (excluding TTN)
	Pooled Data	Sanger cohort	NGS cohort		NGS cohort		NGS cohort
Patients n	387	84	303		303		303
Positive test n (%)	126 (32.6)	29 (34.5)	97 (32.0)		109 (36.0)		109 (36.0)
Positive test or novel candidates n (%)	127 (32.8)	29 (34.5)	98 (32.3)		120 (39.6)		113 (43.2)
Test with non-benign variants(1) n (%)	155 (40.1)	33 (39.3)	122 (40.3)		205 (67.7)		163 (53.8)
Inconclusive test n (%)	29 (7.5)	4 (4.8)	25 (8.3)		96 (31.7)		54 (17.8)
Number of rare variants	167	33	134		308		199
Pathogenic n (%)	68 (40.7)	14 (42.4)	54 (40.3)		57 (18.5)		57 (28.6)
Likely Pathogenic n (%)	63 (37.7)	15 (45.5)	48 (35.8)		58 (18.8)		57 (28.6)
VUS n (%)	35 (21.0)	4 (12.1)	31 (23.1)		182 (59.1)		77 (38.7)
Likely Benign n (%)	1 (0.6)	0 (0.0)	1 (0.7)		11 (3.6)		8 (4.0)
Novel variants	48	10	38		110		61
Pathogenic or Likely Pathogenic n (%)	35 (72.9)	9 (90.0)	26 (68.4)		29 (26.4)		29 (47.5)
Novel Candidate variants	1 (2.1)	0 (0.0)	1 (2.6)		27 (24.5)		7 (11.5)
VUS (excluding candidate variants) n (%)	11 (22.9)	1 (10.0)	10 (26.3)		51 (46.4)		24 (39.3)
Benign or Likely Benign n (%)	1 (2.1)	0 (0.0)	1 (2.6)		3 (2.7)		1 (1.6)
(1) All rare variants excluding benign and likely benign variants. n: number; NGS: next generation sequencing; VUS: variant of unknown significant.
